# Supplementary material for: Machine learning prediction of motor response after deep brain stimulation in Parkinson’s disease—proof of principle in a retrospective cohort
Source: PeerJ. 2020 Nov 18;8:e10317. doi: 10.7717/peerj.10317 (PMC7680051; doi:10.7717/peerj.10317)
Supplement: Supplemental Information 2 — Data set used for prediction model development. ave: average (left and right). cat: categorical. DBS: deep brain stimulation. FLU: Verbal fluency test. freq: frequency (Hz). Gender: 1: male, 2: female. HY: Hoehn & Yahr scale LED: levodopa equivalent daily dosage. let: letters. pre or T0: preoperative. post or T1: one-year postoperative. pw: pulsewidth (microseconds). Stroop_int : outcome measure Stroop test. UPDRS: Unified Parkinson Disease Rating Scale. volt: voltage (V). * Age is changed in to age range in confirmation with local and European data safety laws. [file peerj-08-10317-s002.xlsx]

## Sheet: dataStart
Gender (1=m, 2=f)	Age_range	Disease_duration	Age_range_disease_onset	UPDRS.I_pre_on	UPDRS.II_pre_on	UPDRS.III_pre_on	UPDRS.III_pre_LEDdif	UPDRS.IV_pre_on	HY_pre_on	HY_pre_off	Stroop_int_T0	FLU_cat_T0	FLU_let_tot_T0	LED_pre		UPDRS.II_post_1y_on.on	UPDRS.III_post_1y_on.on	UPDRS.IV_post_1y_on.on		HY_post_1y_on.on	LED_post_1y		FLU_cat_T1	FLU_let_tot_T1	Stroop_1_T1	Stroop_2_T1	Stroop_3_T1	Stroop_3_mistakes_T1		DBS_1y_volt_ave	DBS_1y_freq_ave	DBS_1y_pw_ave
1	50_59	15	40_49	0	0	7	-58	9.5	2	5	76.2	36	36	1675		12.5	16	7		3	1200		32	32	34	58	121	0		2.8	130	90
1	50_59	3	40_49	2.5	6	31	-18	6	2.5	2.5	47	43	40	1802		16	25	5		3	969		33	31	54	82	111	0		1.5	130	90
1	50_59	27	30_39	2	13.5	47.5	-10.5	7	3	3	90.5	28	32	1231		4	26.5	1.5		2.5	187.5		21	12	106	121	270	8		3.25	130	90
1	50_59	18	30_39	0	12	21	-14	6	3	4	66.5	33	30	505		4.5	9.5	0		2	873		31	21	54	79	133	0		1.65	180	90
2	70_79	7	60_69	2	11.5	36.5	-19.55	9	3	3	108.5	23	4	870		8	21.5	3.5		3	645		17	3	71	96	530	24		2.5	180	105
1	60_69	13	50_59	0	10	12	-26	12	3	4	88	24	31	1000		9	15.5	0		2.5	0		19	27	72	108	207	0		2.4	180	135
1	60_69	6	60_69	0	6.5	19	-9.5	0	2.5	2.5	103	38	33	740		8	17.5	0		2.5	665		22	22	80	117	294	6		4.1	180	90
2	50_59	17	30_39	0	5	10	-43	0	2	3	47.5	52	52	1400		3	7	2		2.5	234		42	52	42	65	101	0		3.15	180	90
2	60_69	10	50_59	2	15	21	-20	9	2.5	2.5	42	39	34	1875		4	11.5	4		3	1625		25	20	48	56	105	0		3.95	180	90
2	70_79	15	50_59	0	11	22	-21	11	3	3	51	32	27	687.5		10.5	20.5	3		3	0		28	24	64	92	146	0		3.1	180	90
2	60_69	20	40_49	3	11	30.5	-17.5	13.5	3	4	77	28	30	2185		23	57	7.5		4	665		27	11	63	101	363	12		4.2	130	60
1	60_69	19	40_49	2	8	18	-18.8	3	3	4	55	45	46	1175		4	14	0			665		32	34	54	73	128	3000		3.7	180	90
2	50_59	16	40_49	1	0	5	-28	2	2.5	2.5	53	38	36	687.5		2	8.5	1		3	687.5		33	34	49	82	142	1		2.8	130	90
1	70_79	5	60_69	0	8.5	40	-9.5	2	3	3	41.5	26	21	180		8.5	19.5	0		2	250		24	13	112	131	133	0		2.5	180	90
1	60_69	14	50_59	2	18	27	-22	6	4	4	72.5	29	34	1663		7	18	4		1.5	875		36	38	59	76	178	2		1.2	130	60
2	60_69	11	50_59	2	37	52	0	0	3	3	57	31	32	0		13	13	1		2.5	0		25	20	44	67	104	0		4.35	180	105
2	60_69	12	50_59	1.5	4.5	13	-10	1	2.5	3	37.5	55	53	763		1.5	3.5	1		2	700		47	50	45	62	122	10000
2	50_59	12	40_49	1	4	12	-15	11	2	3	59	45	21	725		4	4	0					42	32	40	59	132	4000		3.25	185	90
2	70_79	4	70_79	3	22	57	0	1	4	3	46.5	29	34	0		15	16	1		3	0		23	29	65	94	171	4		2.45	180	120
1	60_69	11	50_59	4	23	55	-1	7.2	3	4	90.5	22	23	790		8	6	3			540		27	17	65	92	150	0		3	130	90
2	60_69	9	50_59	2	5.5	17.5	-15	2.5	2.5	3	37	44	36	1559		9.5	20.5	1.5		3	494		28	37	70	72	141	5		2.45	130	90
2	60_69	9	50_59	0	10.5	26	-9.95	5	3	4	76.2	49.4	37	750		8	5.5	3			625									2.45	180	90
1	70_79	9	60_69	3	7	10	-20	2	2.5	3	72	35	35	1050		20	29	1		3	1194		22	22	78	127	293	0		2.75	180	90
1	40_49	9	30_39	2	2	10.5	-22	6	2	2	26.5	51	40	1641		1	4	3		2	288		67	46	44	56	78	2		3.35	130	105
1	50_59	10	40_49	2	9.5	48	-0.5	3.5	2.5	4	39	40	48	162.5		4	12.5	0			100		38	40	22	29	33	1		3.15	130	105
1	60_69	8	50_59	1	6	21	-31	4	4	2.5	100	20	13	1611		2	17.5	0		1			12	11	84	118	170	0		1.8	190	90
1	60_69	10	50_59	3	18	34	0	7	3	3	47	32	39	1704		20	12.5	2			975		34	31	42	51	97	1000		1.75	130	90
2	60_69	12	50_59	1	11	22	-9.5	6	3	2.5	36	42	46	1063		4	11.5	0		2	471		39	40	50	65	132	1000		2.75	180	105
1	40_49	9	30_39	4	7	15	-52	15	2	4	32	67	43	1469		6.5	0	5			981		55	48	41	52	80	3000		3.1	130	60
1	40_49	5	40_49	0.5	9	15	-18.5	10	2	3	44.5	37	42	1915		8	16	4		2.5	695		29	28	59	64	109	5		2.8	180	90
1	60_69	7	50_59	2	12.5	24.5	-11	1	2.5	2.5	39	44	36	1963		11	20	2		2.5	688		33	29	63	86	122	5000		2.35	180	120
1	60_69	11	50_59	0	4.5	11.5	-18.5	5	2	2.5	68.5	44	18	1263		4.5	5	3		2.5	575		36	18	53	71	129	2		2.7	130	120
1	50_59	12	40_49	0	1.5	10.5	-23.5	6.5	1.5	3	29.5	44	38	1275		6	16	4		2.5	500		30	24	51	67	98	6		2.6	180	90
2	50_59	9	40_49	1	15.5	14	-22	14	4	4	41	26	24	1334		9	12	6			1169		29	24	52	61	105	0		1.25	130	90
2	60_69	7	50_59	0	4	18.5	-13.5	12	2.5	2.5	35	45	31	1538		10	24.5	7.5		2.5	750		38	15	50	62	108	4		1.55	130	90
1	50_59	5	50_59	0	14	20.5	-3.5	1	3	2.5	68.5	27	17	981		6	13	0		1	347		28	28	38	66	175	3000		2.25	180	135
2	70_79	15	50_59	0	7.5	13.5	-17	15	4	2.5	132.5	37	32	593		23	35	2		3	615		29	36	55	77	151	2000		2.4	130	75
2	60_69	13	50_59	2	13.5	19.5	-13	4.5	3	3	73	37	19	665		13	22.5	2			338		36	17	64	90	179	3		1.5	130	90
2	50_59	14	30_39	1	3	19	-41	14	3	4	29.5	57	65	1010		11	14	0					48	50	49	64	83	4000
1	70_79	3	60_69	3	16	31	-2.15	7	1.5	4	59.5	48	39	0		15	18.5	2		2.5	0		36	37	60	92	216	9		4.75	230	135
1	60_69	14	40_49	0	8	21	-34	8	2	4	42	43	45	1600		8	13	4		2.5	1931		33	41	56	99	135	4000		4.3	180	90
1	50_59	9	40_49	1	4	7	-45	6	2	2.5	45.5	41	41	838		8	9	1		1	600		36	49	49	75	109	2000
1	60_69	27	30_39	1	13	18	-21	6.5	2.5	2.5	63.5	30	33	700		9	24	2		2.5	187.5		21	24	51	84	164	5		1.3	130	90
2	50_59	19	30_39	2	12	33	-36	10	4	3	42	46	38	1535		9	8	2			448		37	36	61	68	82	0		1.95	180	90
1	50_59	15	40_49	1	16	25	-22	1	3	4	43.5	55	40	1444		6	13	2		2	909		48	44	41	59	96	5000		2.95	180	90
2	60_69	9	50_59	1.5	14	34	-7.95	11	4	2.5	54	36	39	1850		8	14.5	7		2.5			27	32	60	83	118	0		2.8	130	60
2	50_59	3	50_59	0	13	6	-20	0	2.5	2.5	34.5	46	39	665		9.5	17.5	3.5		2.5	52		47	52	33	42	74	2		2.95	130	90
2	60_69	3	60_69	0	0.5	6	-9	1.5	1	2.5	27.5	54	50	850		0.5	2	1		1	722		40	37	45	60	80	1000		2.2	180	75
1	50_59	14	40_49	2	6	14	-5	7	3	2	17	34	41	1160		2	1	1			745		29	42	46	51	69	3000
1	60_69	14	40_49	0	7	14	-11	0.5	2.5	2.5	37.5	44	47	1793		15.5	22	3		2.5	1168		35	50	38	57	106	1		2.1	180	90
2	70_79	11	50_59	3	4	10	-24	10	3	3	44	55	58	1079		12	11	1		2.5	300		49	56	40	51	96	3000		2.8	180	90
1	70_79	13	50_59	0	20.5	49	8.2	5	4	3	70	44	27	563		26.5	37	2		4	375		34	19	76	82	328	46000
1	50_59	18	40_49	4	8	16	-20	8	2	4	101	31	47	1069		13	17	3					35	42	45	54	110	4000		4	130	90
2	70_79	18	50_59	1	9	23	-10	11	3	2.5	75	31	39	827.5		15	18	5		3	390		28	45	49	63	124	4000		2.8	180	120
1	60_69	3	60_69	4	18.5	45.5	-11.7	4	2.5	3	309.5	31	16	281		9	23	0			281		20	13	97	192	307	11000		4.4	180	180
2	60_69	19	50_59	5	10	10	-14	4	1	1.5	76.5	34	34	1456.55		8.5	19.5	1		3	1006		34	28	53	69	119	3000		3.05	130	120
1	60_69	8	50_59	2	1	2	-26	6	2.5	2.5	103	29	30	1863		0	0	2			1076		25	24	53	85	259	5000		2.8	180	60
2	60_69	7	50_59	1	9.5	39	-11	8	2.5	4	36	43	34	799		7	28.5	6.5		2.5	998		33	19	48	63	105	1000		0.35	180	75
1	60_69	4	60_69	0	6	20.4	-28.6	0	4	5	34	40	31	1120		16.5	20.5	3		3	435		30	22	57	77	145	9000		2.55	130	150
1	50_59	10	40_49	0	6	12	-21	5	2	3	41.5	41	51	1579.15		11	14	2		2	725		38	54	54	67	104	0		2.55	180	90
2	50_59	11	40_49	0	0	1	-19.5	5.5	2.5	2.5	54.5	45	37	1260		9	14	8.5			329		51	39	44	58	116	3		2.25	130	90
1	60_69	5	60_69	0	13	15	-34	7	3	2.5	45.5	39	39	1675		13	6	0		2.5	500		28	32	54	75	192	3000		4.5	180	90
2	50_59	14	40_49	0	10	24	-2.5	7	2.5	2.5	51.5	43	33	656		6.5	15	0		2.5	94		35	37	45	64	120	3000		3	130	60
1	60_69	6	50_59	0	1	7.5	-15	3	2.5	2.5	33.5	58	52	2289		5.5	13	4			1024		45	48	38	56	93	3		2.5	180	90
1	50_59	10	40_49	1	9	12	-22	7	3	4	38	46	41	1988		9	11.5	0		2.5	491		43	44	54	73	95	0		3.2	180	90
1	40_49	5	30_39	2	9.5	15.5	-27.5	6	2.5	2	33	36	26	1930		10	13	1.5		2	500		31	26	59	66	106	0		1.95	180	90
1	50_59	20	30_39	2	29	37	0	2	3	3	33.5	31	15	513		10	14.5	2		3	780		28	36	61	65	110	0		3.6	130	90
2	70_79	8	60_69	2.65	15.5	39	-21.5	4.8	2	3	52.5	56	50	0		13.5	28.5			2.5	0		40	40	45	66	151	8		2.45	125	90
2	50_59	14	40_49	0	4	16.5	-23	6	2.5	2.5	61.5	37	43	1813		5	9	3		2.5	1300		30	34	47	67	134	0		2.15	130
1	70_79	8	60_69	3	16	18.5	-15	8	3	3	34	38	19	1792		18.5	18	6.5		3	790		32	19	58	64	126	9
1	40_49	4	40_49	2	12.5	27.5	-11	4.5	2.5	2.5	37.5	43	36	2928		9.5	7.5	5		2	2453		31	33	46	69	96	2		3.2	130	60
1	60_69	10	50_59	2.5	15	32	-34	6	2.5	4	35.5	56	46	1924		8	10.5	8.5			1925		43	38	49	86	124	0		3.05	130	60
1	60_69	6	60_69	1	7.5	12.5	-15	2	2.5	2.5	43	35	35	629			29			2	40		27		57	85	148	10		2.05	180	60
2	60_69	13	40_49	0.5	12	20	-23.5	9.15	2.5	4	56.5	32	23	1047.5		9.81818	14.75	6.3		2	379		40	23	46	76	143	0		2	130	60
1	60_69	7	50_59	1.95	17	28	-2	0	3	3	43.5	37.9	33.5	490		23.5	33.3333	9.3		3	660									4.1	180	90
2	50_59	9	60_69	0.95	7.05	17	-24.5	1	2.5	2.5	21	49	54	2023		11.6364	18.9167	7.3		2	2648		41	45	48	58	98	4		2.65	130	60
1	60_69	14	50_59	1.1	8.9	22	-20.5	6.25	2.5	2.5	29	49	26	1838			13.9167	1.3		2	712.5		54	34	57	72	83	1		2.1	130	60
2	50_59	3	50_59	0	15	17	1	5.5	2.5	2.5	23.5	53	40	157			15			2	52		48	39	48	58	80	1		1.6	130	60
1	60_69	11	50_59	0.25	0	11	-22.5	0	2	2.5	74	29	19	2489		19	27	5		2	1448		16	16	85	132	228	1		3.3	90	60
2	50_59	9	40_49	1.1	9	20.5	-8	1	2.5	2.5	59	35	19	1762		10	15	2		2.5	633		13	19	53	81	120	1		1.45	110	60
1	70_79	6	60_69	2.3	9.5	32	-7	1	2.5	2.5	55.5	29	29	594		16	57	1		3	530.5		21	10	100	128	156	0		3.1	130	60
2	50_59	17	40_49	2	11	40	27.5	8	2.5	4	54.5	45	33	695		5.27273	11.4167	3.3		2	450		47	38	44	66	106	0		2.95	180	60
2	60_69	10	50_59	0.4	14	9	-33	2.65	2.5	3	36.5	42	42	1347		12.5	15.8333	5.3		3	937.5									3.55	90	60
1	40_49	7	40_49	1.65	12.95	38	-33	0	3.5	3	50	45	43	1500		3.45455	4.75	5.3		2	450		43	42	46	58		0		3	180	60
1	50_59	6	50_59	1.95	11.7	29	-14	1	2.5	3	53.5	51	39	1125		7.09091	23.9167	0.3		2	0		41	28	48	62	106	0		1.6	130	60
1	50_59	8	50_59	1.1	0	6	-48	4.9	2.5	3	58	35	38	1438		10.5	23.3333	1.3		3	375		36	20	61	73	131	0		2.4	130	60
2	50_59	12	40_49	0.9	1.5	10.5	-13.5	5.4	2.5	2.5	57	35	39	1200		8.90909	11.4167	0.3		2	375		34	40	57	76	160	5
1	70_79	10	60_69	1.7	10.1	21	-17	3	3	4	59	37	37	1986		16.1818	24.75	5.3		2	900		25	23	59	70	120	2		1.95	130	60
1	50_59	6	50_59	1.45	2	23.5	-17.5	2.95	2	2	42	41	44	675		6.18182	10.5833	0.3		2	417.5		37	31	49	60	100	2		2.3	180	75
